# Supplementary material
Source: publisher figshare collection journal article supplement (https://frontiersin.figshare.com/ndownloader/files/25306817)
Supplement: Supplementary file [file 25306817]

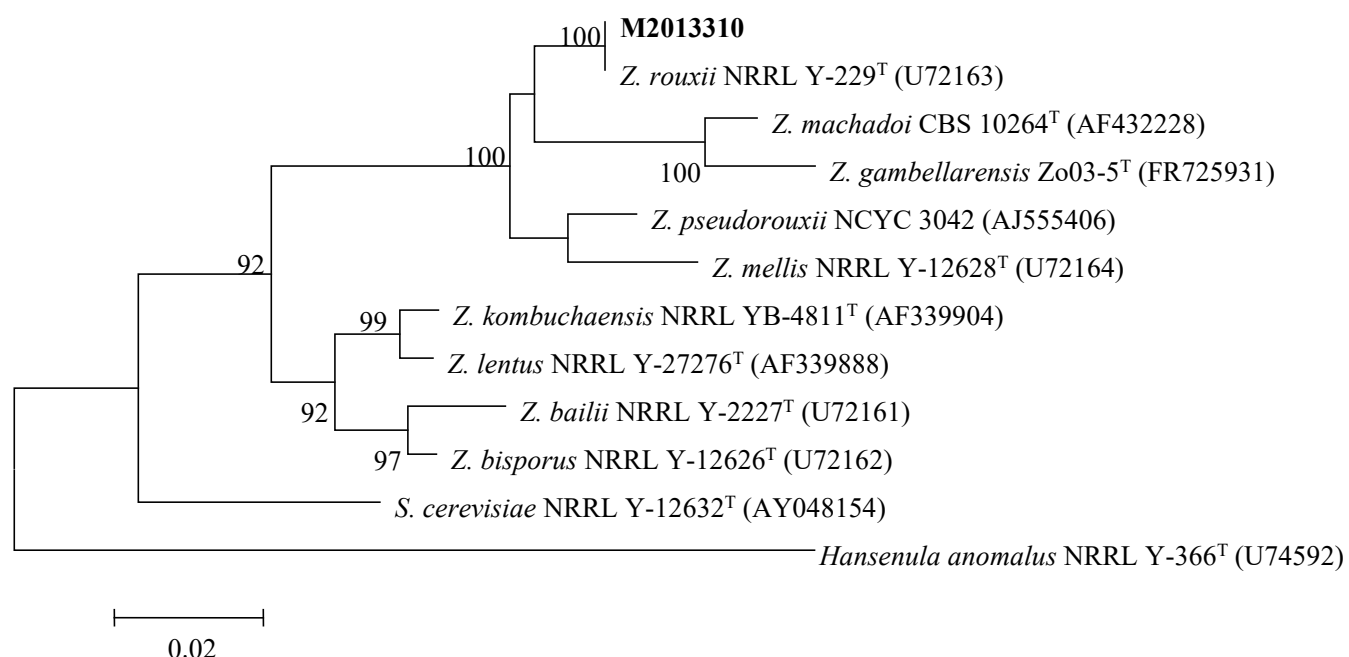

### Supplementary Figure S1

Neighbour-joining phylogenetic tree, based on 26S rRNA gene sequences, showing the relationships of strain M2013310 and representative members of the phylum *Fungi*. Bootstrap values (1000 replications) are shown as percentages at each node only if they are 70% or greater. Bar, 0.02 substitutions per nucleotide position.

### Method

Phylogenetic analysis based on 26S rRNA gene was performed by using the software package MEGA version 5.0 (Tamura et al. 2011) after multiple alignment of the data via CLUSTAL\_X (Thompson et al. 1997). Phylogenetic trees were constructed by neighbor-joining (Saitou and Nei 1987). Evolutionary distances for the neighbor-joining algorithm were calculated with Kimura's two-parameter method (Kimura 1980) and the topology of the neighbor-joining tree was evaluated by bootstrap analysis on the basis of 1000 replications (Felsenstein 1985). Close-neighbor-interchange (search level = 2, random additions = 100) was applied in the maximum-parsimony analysis. Sequences from *Saccharomyces cerevisiae* (AY048154) and *Pichia anomalous* (U74592) were included as the outgroup.

### References

- Tamura K, Peterson D, Peterson N, Stecher G, Nei M, Kumar S (2011) MEGA5: molecular evolutionary genetics analysis using maximum likelihood, evolutionary distance, and maximum parsimony methods. *Molecular biology and evolution* 28 (10):2731-2739. doi:10.1093/molbev/msr121
- Thompson JD, Gibson TJ, Plewniak F, Jeanmougin F, Higgins DG (1997) The CLUSTAL\_X windows interface: flexible strategies for multiple sequence alignment

aided by quality analysis tools. *Nucleic acids research* 25 (24):4876-4882

Saitou N, Nei M (1987) The neighbor-joining method: a new method for reconstructing phylogenetic trees. *Molecular biology and evolution* 4 (4):406-425

Kimura M (1980) A simple method for estimating evolutionary rates of base substitutions through comparative studies of nucleotide sequences. *Journal of molecular evolution* 16 (2):111-120

Felsenstein J (1985) Confidence Limits on Phylogenies: An Approach Using the Bootstrap. *Evolution* 39 (4):783-791. doi:10.2307/2408678
